# Supplementary material
Source: HighWire-hosted journal article supplement (https://drc.bmj.com/content/8/1/e001126)
Supplement: inline-supplementary-material-2 [file inline-supplementary-material-2.xlsx]

## Sheet: Table S1
Table S1: Demographic and health characteristics of the 73 participants excluded from the analysis
	Excluded sample (n=73)		Included sample (n=283)
Variable	Mean or Count (SD or %)	Missing Data, Count (%)	Mean or Count (SD or %)	P-diff (Excluded vs. Included)*
Age (years)	16.4 (5.63)	1 (1.4)	13.3 (3.02)	<0.0001
Sex, Male	27 (37.0)	-	129 (45.6%)	NS
Race/ethnicity				NS
Non-Hispanic White	29 (39.7)	-	68 (24.0%)
African American	24 (32.9)	-	104 (36.7%)
Hispanic	18 (24.6)	-	98 (34.6%)
Other	2 (2.8)	-	13 (4.6%)
BMI Z-score	1.9 (0.9)	25 (34.2)**	2.01 (0.73)	NS
BMI (kg/m2)	30.3 (7.9)	1 (1.4)	31.0 (6.7)	NS
HFF_percent	6.20 (11.4)	-	7.14 (9.80)	NS
VAT Ratio	0.116 (0.0484)	3 (4.1)	0.111 (0.044)	NS
Deep SAT Ratio	0.285 (0.0576)	3 (4.1)	0.283 (0.069)	NS
Superficial SAT Ratio	0.261 (0.0637)	3 (4.1)	0.273 (0.066)	NS
ALT (U/L)	27.4 (28.0)	15 (20.5)	25.5 (20.9)	NS
Systolic BP (mm Hg)	118 (11.6)	11 (15.1)	117 (10.4)	NS
Diastolic BP (mm Hg)	70.3 (8.06)	10 (13.7)	66.8 (7.54)	0.003
Fasting glucose (mg/dL)	89.9 (7.89)	-	90.3 (8.28)	NS
Fasting insulin (uU/mL)	27.8 (21.6)	9 (12.3)	32.8 (23.4)	NS
HOMA-IR	6.3 (5.3)	10 (13.7)	7.43 (5.55)	NS
WBISI	2.60 (1.57)	11 (15.1)	1.98 (1.32)	0.005
Insulinogenic index	4.68 (7.50)	20 (27.4)	4.98 (4.61)	NS
Disposition index	11.5 (32.0)	21 (28.8)	7.75 (6.37)	NS
Triglycerides (mg/dL)	90.9 (61.7)	20 (27.4)	104 (62.7)	NS
HDL cholesterol (mg/dL)	47.3 (11.2)	8 (11.0)	43.7 (10.6)	0.021
LDL cholesterol (mg/dL)	85.9 (22.0)	8 (11.0)	91.4 (31.5)	NS
Total cholesterol (mg/dL)	152 (23.5)	8 (11.0)	155 (37.2)	NS
NAFLD	18 (24.7)	-	100 (35.3%)	NS
Type 2 diabetes mellitus	1 (1.4)	-	7 (2.5%)	NS
Impaired glucose tolerance (IGT)	12 (16.4)	-	44 (15.5%)	NS
Impaired fasting glucose (IFG)	5 (6.8)	-	18 (6.4%)	NS
Both IGT and IFG	4 (5.5)	-	6 (2%)	NS
*NS=nonsignificant difference. **The most common reason for individuals missing data for BMI z-score is due to their age being too old (>20 yrs old). Abbreviations: NAFLD=nonalcoholic fatty liver disease; BMI=body mass index; VAT=visceral adipose tissue; SAT=subcutaneous adipose tissue; BP=blood pressure; WBISI=Whole body insulin sensitivity index; HOMA-IR=Homeostatic model assessment of insulin …
