# Supplementary material
Source: HighWire-hosted journal article supplement (https://drc.bmj.com/content/8/1/e001126)
Supplement: inline-supplementary-material-4 [file inline-supplementary-material-4.xlsx]

## Sheet: Table S3
Table S3: Summary of the association scores generated from pairwise association analyses of the clinical variables dataset and the hepatic and abdominal fat deposition dataset in xMWAS.
*From partial least squares (PLS) regression with n-1 PLS components. Only showing variables associated with at least one of the body fat variable at |r|>0.15 & p<0.05. **Log-transformed prior to analysis; except for hepatic fat fraction, which was square root transformed. ***Detected community indicates the community or cluster that the clinical variable was detected in by xMWAS' multilevel comm…
		Pairwise association scores*				Community-level information***
Node ID	Clinical Variable	Hepatic Fat Fraction**	VAT Ratio**	Deep SAT Ratio**	Superficial SAT Ratio**	Detected Community	Centrality Vector
Y1	Systolic BP	0.1556	-0.0419	-0.0174	0.0166	1 (Hepatic Fat)	0.023
Y10	Triglycerides**	0.2551	0.0382	-0.0764	0.0388	1 (Hepatic Fat)	0.038
Y11	HDL	-0.2054	0.0205	-0.0047	-0.0192	1 (Hepatic Fat)	0
Y4	Fasting Insulin**	0.3297	0.0898	-0.0711	-0.0734	1 (Hepatic Fat)	0.049
Y5	WBISI**	-0.3664	-0.0967	0.0697	0.0567	1 (Hepatic Fat)	0
Y7	Disposition Index**	-0.1715	-0.1202	0.1448	0.0394	1 (Hepatic Fat)	0
Y8	HOMA-IR**	0.3261	0.0798	-0.06	-0.0783	1 (Hepatic Fat)	0.048
Y9	ALT**	0.374	0.0654	0.0214	-0.0846	1 (Hepatic Fat)	0.055
