# Supplementary material
Source: HighWire-hosted journal article supplement (https://drc.bmj.com/content/8/1/e001126)
Supplement: inline-supplementary-material-5 [file inline-supplementary-material-5.xlsx]

## Sheet: Table S4
Table S4: Results from multivariable linear regression of hepatic fat fraction with selected m/z features in the hepatic fat community
*Hepatic fat fraction was square root transformed prior to analysis. Model 1 was adjusted for age (years), sex, race/ethnicity, BMI z-score, and the other body fat variables (log-VAT ratio, log-deep SAT ratio, and log-superficial SAT Ratio), and multiple testing by the Benjamini-Hochberg method. Only m/z features with FDR-adjusted q<0.05 in Model 1 and with confirmed or annotated chemical matches…
						Model 1 (partially adjusted)		Model 2 (+ Adj. for WBISI)
m/z	Time (s)	Chemical_Name	Column	Adduct	MSI Level	Beta1	Adj q1	Beta2	Adj q2	Compound Class
313.992	24.3	Bromazepam	C18neg	M-H	2	0.0624791	0.0352442	0.0426663	0.160791	1,4-benzodiazepines
325.035	71.8	Dorzolamide	Hilicpos	M+H	2	0.555169	0.000470438	0.459366	0.00735938	2,3,5-trisubstituted thiophenes
189.041	21.7	3-Dehydroquinate	C18neg	M-H	2	0.0605045	0.00738772	0.0558622	0.0210525	Alpha hydroxy acids
89.0244	25.6	Lactic acid	C18neg	M-H	1	0.0386586	0.00370616	0.0300136	0.0262751	Alpha hydroxy acids
90.0277	25.6	Lactic acid	C18neg	M-H_[-1]	2	0.0496006	0.00268374	0.0391315	0.0199356	Alpha hydroxy acids
165.055	57.3	Phenylpyruvic acid	Hilicpos	M+H	1	0.0457214	0.0290349	0.0255465	0.217819	Alpha-keto acids
87.0087	25.5	Pyruvate	C18neg	M-H	1	0.0687862	0.0107252	0.0470179	0.083872	Alpha-keto acids
160.025	98.6	4-Hydroxy-glutamic acid	C18neg	M-H	2	0.117817	0.0461631	0.0827205	0.182945	Amino acids and peptides
88.0403	24.4	Alanine	C18neg	M-H	1	0.0416774	0.00456848	0.0280941	0.0488013	Amino acids and peptides
262.103	102.3	Aspartyl-Glutamine	Hilicpos	M+H	2	-0.172128	0.0307847	-0.197766	0.0262144	Amino acids and peptides
270.091	24.8	Aspartyl-Histidine	C18neg	M-H_[-1]	2	0.0840648	0.0030456	0.068143	0.0199356	Amino acids and peptides
269.088	25.3	Aspartyl-Histidine	C18neg	M-H	2	0.0729372	0.0107229	0.055556	0.0572059	Amino acids and peptides
216.071	26	Captopril	C18neg	M-H	2	0.0418269	0.0113651	0.0466271	0.0123542	Amino acids and peptides
469.285	260.9	Ceanothine C	C18neg	M-H	2	-0.0677596	0.00163873	-0.0576336	0.0106524	Amino acids and peptides
269.075	32.8	GlutamyGlutamate	C18neg	M-H_[-4]	2	0.0667518	0.00268374	0.0654024	0.00872551	Amino acids and peptides
120.003	70.8	Glycine	Hilicpos	M+2Na-H	1	-0.0493175	0.000158114	-0.0439357	0.00178936	Amino acids and peptides
134.106	44.6	Isoleucine/Leucine	Hilicpos	M+H_[+2]	1	0.0515184	0.000470438	0.041302	0.00846659	Amino acids and peptides
131.091	33.3	Isoleucine/Leucine	C18neg	M-H_[-1]	1	0.0544875	0.00105801	0.0444786	0.00973959	Amino acids and peptides
133.105	45.9	Isoleucine/Leucine	Hilicpos	M+H_[+1]	1	0.0487921	0.000631172	0.0384739	0.00982383	Amino acids and peptides
133.108	44.3	Isoleucine/Leucine	Hilicpos	M+H_[+1]	1	0.0498088	0.0047109	0.0413581	0.0251526	Amino acids and peptides
134.109	44.4	Isoleucine/Leucine	Hilicpos	M+H_[+2]	1	0.0383132	0.0188913	0.0249983	0.130097	Amino acids and peptides
132.102	44.9	Isoleucine/Leucine	Hilicpos	M+H	1	0.0479957	0.000703973	0.0381294	0.00982383	Amino acids and peptides
130.087	28.4	Isoleucine/Leucine	C18neg	M-H	1	0.0419776	0.00188007	0.0315784	0.0188972	Amino acids and peptides
148.116	89.3	Lysine	Hilicpos	M+H_[+1]	1	0.0429034	0.0236142	0.038303	0.0600621	Amino acids and peptides
187.072	26.6	N-Acetylglutamine	C18neg	M-H	2	0.102735	0.00715188	0.105429	0.0135861	Amino acids and peptides
165.075	24.7	Phenylalanine	C18neg	M-H_[-1]	1	0.0352562	0.0180848	0.0325149	0.0390251	Amino acids and peptides
118.075	68.9	Proline	Hilicpos	M+H_[+2]	1	0.0512551	0.0247575	0.0328578	0.159777	Amino acids and peptides
104.035	22.9	Serine	C18neg	M-H	1	-0.0341221	0.0149891	-0.0292894	0.0469572	Amino acids and peptides
225.086	32	SerinyValine	C18neg	M+Na-2H	2	0.0588563	0.00121107	0.0571626	0.00474606	Amino acids and peptides
183.085	58	Tyrosine	Hilicpos	M+H_[+1]	1	0.0756775	0.000178275	0.0581543	0.00652059	Amino acids and peptides
180.067	25	Tyrosine	C18neg	M-H	1	0.064199	0.000491249	0.0500064	0.0048971	Amino acids and peptides
182.081	57.4	Tyrosine	Hilicpos	M+H	1	0.0624415	0.000399817	0.0464064	0.0095765	Amino acids and peptides
226.045	55.6	Tyrosine	Hilicpos	M+2Na-H	1	0.0585657	0.00853256	0.0389213	0.0834596	Amino acids and peptides
116.072	27.2	Valine	C18neg	M-H	1	0.0462638	0.000908963	0.0359033	0.0108033	Amino acids and peptides
197.082	45	Guaifenesin	C18neg	M-H	2	0.139612	0.0145675	0.114472	0.0543093	Anisoles
188.008	25.9	p-Cresol sulfate	C18neg	M-H_[-1]	2	-0.256384	0.00521592	-0.284176	0.00872551	Arylsulfates
187.007	27.1	p-Cresol sulfate	C18neg	M-H	2	-0.228672	0.0067781	-0.260888	0.00889781	Arylsulfates
266.062	25.8	Sulfisoxazole	C18neg	M-H	2	0.0604799	0.000609455	0.0495301	0.00872551	Benzenesulfonamides
315.069	30	Valdecoxib	C18neg	M-H_[+2]	2	0.046448	0.00513762	0.0485124	0.00966978	Benzenesulfonamides
313.065	28.6	Valdecoxib	C18neg	M-H	2	0.0764936	0.00813067	0.07776	0.0151636	Benzenesulfonamides
154.049	57.2	3-Hydroxyanthranilic acid	Hilicpos	M+H	2	0.132364	0.0371003	0.174372	0.0164734	Benzoic acids and derivatives
123.044	57	Benzoic acid	Hilicpos	M+H	1	0.0479487	0.0297657	0.0274921	0.209936	Benzoic acids and derivatives
278.057	46.6	N-(2-hydroxymethyl-3-chlorophenyl)anthranilic acid	Hilicpos	M+H	2	0.0876192	0.0153345	0.0863074	0.0305901	Benzoic acids and derivatives
261.041	23.5	Maclurin	C18neg	M-H	2	0.0409224	0.00809466	0.0307247	0.0488013	Benzophenones
623.317	171	Neferine	C18neg	M-H	2	0.143988	0.0116198	0.115396	0.0524561	Benzylisoquinolines
429.24	37.9	Irbesartan	Hilicpos	M+H	2	0.0138972	0.0139037	0.0156902	0.014687	Biphenyls and derivatives
284.007	56.1	Risedronate	Hilicpos	M+H	2	0.0504242	0.00409118	0.0455423	0.0155357	Bisphosphonates
360.129	23.7	De-O-methylsimmondsin	C18neg	M-H	2	0.259771	0.0130983	0.203747	0.0640744	Carbohydrates and conjugates
251.165	211	1-Hydroxyepiacorone	C18neg	M-H	2	-0.0228435	0.0394775	-0.0249742	0.0412384	Carbonyl compounds
411.202	59.3	5-(23-Dihydroxy-3-methylbutyl)-4-(34-epoxy-4-methylpentanoyl)-34-dihydroxy-2-isopentanoy2-cyclopenten-1-one	C18neg	M-H	2	0.314437	0.00891548	0.266987	0.0341059	Carbonyl compounds
146.118	48	3-Dehydroxycarnitine	Hilicpos	M+H	2	-0.0542189	0.0173247	-0.0440232	0.0658902	Carnitines
428.373	25.4	C18 Acylcarnitine	Hilicpos	M+H	2	-0.0491421	0.0245739	-0.0303059	0.166037	Carnitines
425.345	25.4	C18:2 Acylcarnitine	Hilicpos	M+H_[+1]	2	-0.056793	0.0270213	-0.0398117	0.135122	Carnitines
424.342	25.4	C18:2 Acylcarnitine	Hilicpos	M+H	2	-0.0511015	0.0295223	-0.0348554	0.148018	Carnitines
456.404	24.7	C20 Acylcarnitine	Hilicpos	M+H	2	-0.23214	0.00976486	-0.178791	0.0528796	Carnitines
218.138	41	C3 Acylcarnitine	Hilicpos	M+H	2	0.057037	0.0113707	0.0386845	0.0861134	Carnitines
247.173	34.4	C5 Acylcarnitine	Hilicpos	M+H_[+1]	2	0.0973827	0.0478565	0.107368	0.0496863	Carnitines
246.17	38.6	C5 Acylcarnitine	Hilicpos	M+H	2	0.0425228	0.0474146	0.040571	0.0797518	Carnitines
244.154	40.6	C5:1 Acylcarnitine	Hilicpos	M+H	2	0.103621	0.025881	0.102022	0.044745	Carnitines
162.913	23.7	Chloral hydrate	C18neg	M-H	2	-0.0276209	0.000502913	-0.0280299	0.00148528	Chlorohydrins
149.059	48.1	Cinnamic acid	Hilicpos	M+H	2	0.0289726	0.0113707	0.0244206	0.0425208	Cinnamic acids
613.558	25.5	Randilongin	Hilicpos	M+H	2	0.246132	0.00508382	0.205769	0.0257972	Cinnamic acids
107.05	27	p-Cresol	C18neg	M-H	2	-0.228466	0.0103394	-0.26734	0.0104441	Cresols
147.121	59.6	Dibutyl sulfide	Hilicpos	M+H	2	-0.071036	0.00742624	-0.0563845	0.0437936	Dialkylthioethers
197.043	24.4	4-Methyldibenzothiophene	C18neg	M-H	2	0.0304927	0.0291656	0.02417	0.0907638	Dibenzothiophenes
501.281	200.3	Fexofenadine (Allegra)	C18neg	M-H_[-1]	2	-0.0687237	0.00385016	-0.0586948	0.0188972	Diphenylmethanes
502.284	200.3	Fexofenadine (Allegra)	C18neg	M-H_[+2]	2	-0.078536	0.00368086	-0.0659474	0.0188972	Diphenylmethanes
500.278	199.9	Fexofenadine (Allegra)	C18neg	M-H	2	-0.0657706	0.00443029	-0.0562386	0.0198183	Diphenylmethanes
233.156	31.8	3-Mercaptohexyl hexanoate	Hilicpos	M+H	2	0.0645958	0.0367017	0.0556035	0.0864424	Fatty acid esters
219.141	35.3	3-Mercaptohexyl pentanoate	Hilicpos	M+H	2	0.0653082	0.00677605	0.0456013	0.0628494	Fatty acid esters
201.15	67.2	3-Hydroxynonyl acetate	C18neg	M-H	2	-0.0624304	0.0461631	-0.0342216	0.290271	Fatty alcohol esters
119.049	57.2	246-Octatriyn-1-ol	Hilicpos	M+H	2	0.0528423	0.0236142	0.0304111	0.18988	Fatty alcohols
155.108	295.3	4-Hydroxynonenal	C18neg	M-H	2	-0.0833731	0.0461631	-0.106607	0.0238689	Fatty alcohols
575.503	25.5	Montecristin	Hilicpos	M+H	2	0.241808	0.00287891	0.203702	0.0164734	Fatty alcohols
627.13	25.4	6-Acetylapiin	C18neg	M+Na-2H	2	0.0815541	0.00338554	0.0754514	0.011807	Flavonoid glycosides
605.15	24.1	6-Acetylapiin	C18neg	M-H	2	0.058445	0.0427948	0.0609599	0.0488013	Flavonoid glycosides
523.356	38.2	LysoPC(18:1)	Hilicpos	M+H_[+1]	2	-0.0669905	0.000158114	-0.0629476	0.00125235	Glycerophosphocholines
544.338	39	LysoPC(18:1)	Hilicpos	M+Na	2	-0.0978926	0.000158114	-0.0863221	0.00125235	Glycerophosphocholines
566.32	40.8	LysoPC(18:1)	Hilicpos	M+2Na-H	2	-0.147961	0.000158114	-0.136955	0.00178936	Glycerophosphocholines
522.353	39.1	LysoPC(18:1)	Hilicpos	M+H	2	-0.063261	0.000238522	-0.059492	0.00178936	Glycerophosphocholines
542.321	43.2	LysoPC(18:2)	Hilicpos	M+Na	2	-0.108952	0.000158114	-0.12075	9.04819e-05	Glycerophosphocholines
520.34	40.7	LysoPC(18:2)	Hilicpos	M+H	2	-0.0726712	0.00101289	-0.078597	0.00178936	Glycerophosphocholines
521.343	38.8	LysoPC(18:2)	Hilicpos	M+H_[+1]	2	-0.0705986	0.0019071	-0.0745416	0.00367371	Glycerophosphocholines
1039.67	38.3	LysoPC(18:2)	Hilicpos	2M+H	2	-0.102447	0.00348473	-0.0979068	0.0107119	Glycerophosphocholines
1061.65	39.6	LysoPC(18:2)	Hilicpos	2M+Na	2	-0.199254	0.00609187	-0.206434	0.011967	Glycerophosphocholines
550.387	35	LysoPC(20:1)	Hilicpos	M+H	2	-0.0584789	0.0206204	-0.0444999	0.0919788	Glycerophosphocholines
548.369	36.6	LysoPC(20:2)	Hilicpos	M+H	2	-0.0635614	0.00102351	-0.0685632	0.00178936	Glycerophosphocholines
543.324	40.9	LysoPC(20:5)	Hilicpos	M+H_[+1]	2	-0.107957	0.000158114	-0.120202	0.000228834	Glycerophosphocholines
568.337	37.5	LysoPC(22:6)	Hilicpos	M+H	2	-0.0631914	0.00542203	-0.0719287	0.00683228	Glycerophosphocholines
569.341	37.6	LysoPC(22:6)	Hilicpos	M+H_[+1]	2	-0.0643635	0.00587097	-0.0716061	0.00856133	Glycerophosphocholines
480.344	36.8	LysoPC(P-16:0)	Hilicpos	M+H	2	-0.0511989	0.011687	-0.0488101	0.0262724	Glycerophosphocholines
508.376	38.1	LysoPC(P-18:0)	Hilicpos	M+H	2	-0.0581744	0.00481865	-0.0558134	0.0126572	Glycerophosphocholines
509.379	38	LysoPC(P-18:0)	Hilicpos	M+H_[+1]	2	-0.0554913	0.0248988	-0.0561319	0.0396343	Glycerophosphocholines
734.566	35	PC(32:0)	Hilicpos	M+H	2	-0.142404	0.0113072	-0.149687	0.0164621	Glycerophosphocholines
732.551	35.5	PC(32:1)	Hilicpos	M+H	2	0.101701	0.0140281	0.0925535	0.037414	Glycerophosphocholines
740.519	30	PC(33:4)	Hilicpos	M+H	2	0.0696632	0.00927483	0.0837702	0.00846659	Glycerophosphocholines
772.582	33.6	PC(35:2)	Hilicpos	M+H	2	-0.0741929	0.000470438	-0.0673946	0.00383935	Glycerophosphocholines
782.566	34.2	PC(36:4)	Hilicpos	M+H	2	-0.0431317	0.0165124	-0.0373047	0.0525335	Glycerophosphocholines
832.581	30.8	PC(38:4)	Hilicpos	M+Na	2	-0.0831732	0.000623476	-0.0817403	0.0024863	Glycerophosphocholines
810.597	32.2	PC(38:4)	Hilicpos	M+H	2	-0.0495675	0.00845517	-0.0465626	0.0251526	Glycerophosphocholines
792.586	29.9	PC(38:4)	Hilicpos	M+H-H2O	2	-0.0409239	0.0438624	-0.0405329	0.0687922	Glycerophosphocholines
808.582	32.1	PC(38:5)	Hilicpos	M+H	2	-0.0476638	0.011687	-0.0411321	0.0444568	Glycerophosphocholines
804.549	39.5	PC(38:7)	Hilicpos	M+H	2	-0.0595309	0.0113072	-0.070049	0.0104488	Glycerophosphocholines
830.566	30.4	PC(40:8)	Hilicpos	M+H	2	-0.06789	0.00603334	-0.0677651	0.014687	Glycerophosphocholines
858.596	30.2	PC(42:8)	Hilicpos	M+H	2	-0.262456	0.00287891	-0.261026	0.00846659	Glycerophosphocholines
742.572	33.4	PC(P-34:2)	Hilicpos	M+H	2	-0.0502532	0.0459114	-0.0399699	0.135397	Glycerophosphocholines
770.603	32.6	PC(P-36:2)	Hilicpos	M+H	2	-0.106193	0.0184766	-0.0880747	0.0626957	Glycerophosphocholines
794.605	31.4	PC(P-38:4)	Hilicpos	M+H	2	-0.0704374	0.00102351	-0.0592335	0.0100939	Glycerophosphocholines
822.634	30.1	PC(P-40:4)	Hilicpos	M+H	2	-0.0898938	0.0054232	-0.0681643	0.043739	Glycerophosphocholines
820.617	29.8	PC(P-40:5)	Hilicpos	M+H	2	-0.096525	0.000470438	-0.0937013	0.00211957	Glycerophosphocholines
452.276	36.2	LysoPE(16:1)	Hilicpos	M+H	2	0.266316	0.0173247	0.192203	0.0916044	Glycerophosphoethanolamines
450.261	194.7	LysoPE(16:1)	C18neg	M-H	2	0.139919	0.0302169	0.107387	0.111708	Glycerophosphoethanolamines
510.355	37.6	LysoPE(20:0)	Hilicpos	M+H	2	-0.0809724	0.000158114	-0.0698709	0.00210408	Glycerophosphoethanolamines
524.278	198.7	LysoPE(22:6)	C18neg	M-H	2	-0.0558949	0.0139308	-0.0601462	0.0185981	Glycerophosphoethanolamines
525.284	192.5	LysoPE(22:6)	C18neg	M-H_[-1]	2	-0.0539477	0.0189993	-0.0584266	0.0214829	Glycerophosphoethanolamines
716.52	30.8	PE(34:2)	Hilicpos	M+H	2	0.197292	0.0267037	0.158445	0.0909954	Glycerophosphoethanolamines
799.451	54.9	PGP(32:2)	Hilicpos	M+H	2	0.188246	0.0227631	0.212272	0.022816	Glycerophosphoglycerols
833.52	229.1	PI(34:2)	C18neg	M-H	2	0.0512886	0.0302169	0.0319779	0.190438	Glycerophosphoinositols
861.549	248.5	PI(36:2)	C18neg	M-H	2	0.0455336	0.043699	0.0382283	0.115676	Glycerophosphoinositols
834.532	223.9	PS(40:6)	C18neg	M-H	2	0.0621517	0.0067781	0.0462409	0.0469572	Glycerophosphoserines
806.565	32.6	Lactosylceramide (d18:112:0)	Hilicpos	M+H	2	-0.0504916	0.0186149	-0.0557823	0.0214247	Glycosphingolipids
170.944	26.9	2-Bromophenol	C18neg	M-H	2	-0.0249431	0.000502913	-0.0249971	0.00137911	Halophenols
146.06	42.6	1H-Indole-3-carboxaldehyde	Hilicpos	M+H	2	0.0456046	0.00244476	0.0352032	0.0213415	Indoles and derivatives
147.064	46	1H-Indole-3-carboxaldehyde	Hilicpos	M+H_[+1]	2	0.0441879	0.0027875	0.0340443	0.0242804	Indoles and derivatives
132.081	44.1	3-Methylindole	Hilicpos	M+H	2	0.0425939	0.00481779	0.0334513	0.0325103	Indoles and derivatives
192.065	45.9	5-Hydroxyindoleacetic acid	Hilicpos	M+H	1	0.0478759	0.0206204	0.0394115	0.0697957	Indoles and derivatives
178.086	48.9	5-Hydroxytryptophol	Hilicpos	M+H	2	0.0690182	0.0222516	0.0663228	0.043165	Indoles and derivatives
188.071	46	Indoleacrylic acid	Hilicpos	M+H	2	0.0472482	0.0019071	0.0367018	0.0172563	Indoles and derivatives
189.074	45.7	Indoleacrylic acid	Hilicpos	M+H_[+1]	2	0.0470914	0.00240982	0.0363245	0.0207357	Indoles and derivatives
190.077	45.8	Indoleacrylic acid	Hilicpos	M+H_[+2]	2	0.0478338	0.00259932	0.0374567	0.0216283	Indoles and derivatives
204.067	31.4	Indolelactic acid	C18neg	M-H	2	0.114256	0.00268374	0.112962	0.00872551	Indoles and derivatives
206.101	45.7	Tryptophan	Hilicpos	M+H_[+1]	1	0.0467813	0.00236479	0.0364573	0.0195327	Indoles and derivatives
204.086	25.3	Tryptophan	C18neg	M-H_[-1]	1	0.0474492	0.00443029	0.0378999	0.0250449	Indoles and derivatives
206.094	45.5	Tryptophan	Hilicpos	M+H_[+1]	1	0.046117	0.00341136	0.0360599	0.0257972	Indoles and derivatives
205.097	45.8	Tryptophan	Hilicpos	M+H	1	0.0466086	0.00213404	0.036362	0.0179314	Indoles and derivatives
203.083	26.3	Tryptophan	C18neg	M-H	1	0.0421491	0.00268374	0.03225	0.0214829	Indoles and derivatives
409.185	45	Tryptophan	Hilicpos	2M+H	1	0.219087	0.00526086	0.17127	0.0355733	Indoles and derivatives
427.215	46.5	Austalide L	C18neg	M-H	2	0.346115	0.0108825	0.330599	0.0232518	Isoflavans
181.051	22.2	Homovanillic acid	C18neg	M-H	1	0.0965578	0.0108825	0.100571	0.0179231	Methoxyphenols
163.077	50.8	2-Phenylbutyric acid	C18neg	M-H	2	-0.0573907	0.0314058	-0.0515523	0.0659665	Phenylpropanes
353.026	32.9	dIMP	C18neg	M+Na-2H	2	0.0417879	0.0213865	0.0417982	0.0323827	Purines and derivatives
448.986	32.8	IDP	C18neg	M+Na-2H	1	0.0665703	0.00760707	0.0576525	0.0268758	Purines and derivatives
168.018	20.9	Uric acid	C18neg	M-H_[-1]	1	0.0504271	0.0100883	0.0509737	0.0186063	Purines and derivatives
168.024	21.1	Uric acid	C18neg	M-H_[-1]	1	0.0409168	0.00913046	0.0406652	0.0186351	Purines and derivatives
167.021	22.8	Uric acid	C18neg	M-H	1	0.0378946	0.0130698	0.0374215	0.0241201	Purines and derivatives
153.066	37.3	N1-Methyl-2-pyridone-5-carboxamide	Hilicpos	M+H	2	0.132587	0.000196871	0.138889	0.000858258	Pyridinecarboxylic acids
167.061	20.6	β-Carboline	C18neg	M-H	2	0.0457927	0.0191884	0.0469708	0.0277943	Pyridoindoles
129.066	61.3	Dihydrothymine	Hilicpos	M+H	2	-0.165214	0.00123147	-0.123192	0.0178282	Pyrimidines and derivatives
127.051	171.2	Dihydrothymine	C18neg	M-H	2	0.108737	0.0170795	0.120522	0.0185981	Pyrimidines and derivatives
386.998	30.6	dUDP	C18neg	M-H	2	0.062265	0.00166182	0.0642904	0.0044667	Pyrimidines and derivatives
411.042	33.5	Methyl 6-O-digalloyβ-glucopyranoside	C18neg	M+Na-2H	2	0.0971984	0.00273059	0.0850997	0.0135861	Pyrimidines and derivatives
251.128	26.7	Ubiquinone-1	Hilicpos	M+H	2	0.0832114	0.00573896	0.087356	0.0107119	Quinone and hydroquinone lipids
205.16	212.6	delta-Methylionone	C18neg	M-H	2	-0.0197424	0.0299356	-0.0252301	0.0167267	Sesquiterpenoids
299.149	28.9	Toxin T2 tetrol	Hilicpos	M+H	2	0.0749853	0.0410113	0.0705867	0.0762259	Sesquiterpenoids
391.14	50.1	trans-Piceid	Hilicpos	M+H	2	-0.109389	0.00247882	-0.1061	0.00846659	Stilbene glycosides
264.95	59	23579-Pentathiadecane 22-dioxide	Hilicpos	M+H	2	0.098989	0.00375385	0.0938429	0.0109777	Sulfones
286.933	58.5	23579-Pentathiadecane 22-dioxide	Hilicpos	M+Na	2	0.062035	0.00479557	0.0609034	0.0113893	Sulfones
531.277	39.3	Cinncassiol D2 glucoside	Hilicpos	M+H	2	0.0675549	0.035555	0.0535079	0.121614	Terpene glycosides
633.399	38.5	Cloversaponin I	Hilicpos	M+H	2	-0.0906125	0.0342334	-0.0771675	0.0861134	Terpene glycosides
635.414	40.9	Maslinic acid 3-O-b-glucoside	Hilicpos	M+H	2	-0.0542328	0.0107856	-0.0419772	0.0563428	Terpene glycosides
292.086	25.8	Edetic Acid	C18neg	M-H_[-1]	2	0.0710298	0.0402228	0.071943	0.0511241	Tetracarboxylic acids
103.022	182.4	S-Ethyl thioacetate	C18neg	M-H	2	0.0650356	0.0139308	0.0525677	0.0547219	Thioesters
189.003	25.8	Oxalosuccinic acid	C18neg	M-H	2	-0.25681	0.00815372	-0.29984	0.0094715	Tricarboxylic acids
469.329	36.6	Ganoderic acid DM	Hilicpos	M+H	2	0.0655532	0.039253	0.0516265	0.124416	Triterpenoids
571.288	167.1	Ganoderic acid H	C18neg	M-H	2	0.0979178	0.00231074	0.0795543	0.017712	Triterpenoids
572.292	166.7	Ganoderic acid H	C18neg	M-H_[-1]	2	0.0787608	0.0145675	0.0668236	0.0525809	Triterpenoids
168.093	45.5	3-(4-Methyl-3-pentenyl)thiophene	Hilicpos	M+H_[+1]	2	0.0290762	0.0277298	0.0253404	0.0686137	Undefined
245.049	61.8	4-phenylbutanic acid-O-sulphate	Hilicpos	M+H	2	0.159667	0.0245739	0.0917321	0.195661	Undefined
144.081	45.8	6-Methylquinoline	Hilicpos	M+H	2	0.0468253	0.0019071	0.0365442	0.0164734	Undefined
145.084	45.5	6-Methylquinoline	Hilicpos	M+H_[+1]	2	0.0495659	0.00312965	0.0355151	0.0361627	Undefined
200.128	35.5	Ecgonine methyl ester	Hilicpos	M+H	2	0.149827	0.0441198	0.162873	0.0504332	Undefined
170.118	128.9	Homoarecoline	Hilicpos	M+H	2	0.12192	0.00287891	0.133752	0.00432235	Undefined
130.069	82.7	Isoamyl isothiocyanate	Hilicpos	M+H	2	-0.234412	0.00247882	-0.174666	0.0261273	Undefined
621.301	165.5	Isotetrandrine	C18neg	M-H	2	0.0557222	0.0113617	0.0474048	0.0403922	Undefined
602.347	218.6	Janthitrem E	C18neg	M-H	2	-0.107041	0.000574584	-0.0967487	0.00479349	Undefined
136.076	55.4	N-Acetylarylamine	Hilicpos	M+H	2	0.063254	0.000298581	0.0468331	0.00896179	Undefined
137.079	56.5	N-Acetylarylamine	Hilicpos	M+H_[+1]	2	0.174728	0.00656573	0.119765	0.0676225	Undefined
178.108	71	N-Methyl-1-deoxynojirimycin	Hilicpos	M+H	2	-0.133008	0.0324927	-0.140601	0.0433091	Undefined
86.0964	41.2	Piperidine	Hilicpos	M+H	2	0.0454758	0.0012226	0.0346425	0.0155161	Undefined
87.0929	36.4	Piperidine	Hilicpos	M+H_[+1]	2	0.0884337	0.000238522	0.0718605	0.00522457	Undefined
87.0998	43.1	Piperidine	Hilicpos	M+H_[+1]	2	0.0467998	0.00102351	0.0358343	0.0143412	Undefined
271.069	26	Pyridine N-oxide glucuronide	C18neg	M-H	2	0.0424345	0.00637566	0.0327846	0.0367093	Undefined
353.015	30.3	Thelephoric acid	C18neg	M-H_[+2]	2	0.218569	0.00562447	0.22368	0.0107498	Undefined
254.027	58	Tizanidine	Hilicpos	M+H	2	0.189803	0.0402719	0.215744	0.0365294	Undefined
206.067	283.2	-	Hilicpos	-	4	-0.271342	0.00508382	-0.278068	0.0105323	-
129.066	254.9	-	Hilicpos	-	4	-0.173518	0.0102884	-0.124155	0.0724365	-
406.772	23.4	-	C18neg	-	4	-0.0664258	0.000491249	-0.0664594	0.00115205	-
592.358	214.6	-	C18neg	-	4	-0.114617	0.000491249	-0.117563	0.00115205	-
404.774	23.9	-	C18neg	-	4	-0.0696633	0.000502913	-0.073487	0.00120529	-
570.62	22.1	-	C18neg	-	4	-0.122584	0.000502913	-0.12836	0.00120529	-
220.871	23.9	-	C18neg	-	4	-0.0329477	0.000491249	-0.0326506	0.00120529	-
276.833	24.5	-	C18neg	-	4	-0.0437848	0.000502913	-0.0430979	0.00123325	-
330.043	31.8	-	C18neg	-	4	0.0725444	0.000502913	0.0749959	0.00123325	-
687.073	28.7	-	C18neg	-	4	0.0958719	0.000502913	0.0991572	0.00123325	-
160.916	23.9	-	C18neg	-	4	-0.0254898	0.000733528	-0.0270847	0.00148528	-
329.039	31.4	-	C18neg	-	4	0.0676441	0.000597477	0.0691119	0.00155167	-
222.868	22.7	-	C18neg	-	4	-0.0319533	0.000502913	-0.0316013	0.00155167	-
569.27	199.5	-	C18neg	-	4	-0.223054	0.000502913	-0.210222	0.00175773	-
710.062	31.7	-	C18neg	-	4	0.317934	0.00172545	0.342486	0.00343716	-
448.877	26.9	-	C18neg	-	4	-0.10146	0.000502913	-0.0940057	0.00401406	-
589.334	218	-	C18neg	-	4	-0.0939744	0.000502913	-0.0850818	0.00401406	-
104.954	24.1	-	C18neg	-	4	-0.0181099	0.000502913	-0.016309	0.00450778	-
390.919	27	-	C18neg	-	4	-0.157955	0.00105801	-0.152944	0.00450778	-
588.331	215	-	C18neg	-	4	-0.0888884	0.000502913	-0.0799458	0.00450778	-
218.874	24	-	C18neg	-	4	-0.0249044	0.00214056	-0.025996	0.00474606	-
450.708	22.1	-	C18neg	-	4	-0.0956869	0.00131026	-0.0933175	0.00479349	-
320.935	26.8	-	C18neg	-	4	-0.0862818	0.000502913	-0.0739064	0.00540763	-
186.96	26.2	-	C18neg	-	4	-0.505268	0.00274784	-0.535848	0.00637146	-
208.845	22.5	-	C18neg	-	4	-0.0314122	0.00214056	-0.0311157	0.00649022	-
510.88	26.9	-	C18neg	-	4	-0.299459	0.00422426	-0.321421	0.00824476	-
688.081	31.8	-	C18neg	-	4	0.296386	0.00248954	0.29206	0.00824476	-
94.925	22.7	-	C18neg	-	4	-0.0220411	0.00142667	-0.020288	0.00824476	-
172.941	26.2	-	C18neg	-	4	-0.0225647	0.00247915	-0.0223901	0.00824476	-
248.097	20.8	-	C18neg	-	4	0.115218	0.0045558	0.125266	0.00826308	-
412.717	22.6	-	C18neg	-	4	-0.0355706	0.00105861	-0.0307723	0.00872551	-
709.057	30.4	-	C18neg	-	4	0.0887681	0.00268374	0.086707	0.00872551	-
150.887	23.1	-	C18neg	-	4	-0.0285819	0.00268374	-0.0282182	0.00872551	-
102.957	23.9	-	C18neg	-	4	-0.0156611	0.00138197	-0.0139658	0.00872551	-
238.025	23	-	C18neg	-	4	0.0725588	0.000502913	0.0556159	0.00889781	-
612.334	214.3	-	C18neg	-	4	-0.0671535	0.00760707	-0.0763088	0.0094715	-
645.305	167	-	C18neg	-	4	0.105608	0.00142585	0.0916411	0.0094715	-
280.921	47.5	-	C18neg	-	4	-0.148789	0.00163873	-0.130459	0.00966978	-
590.341	227.2	-	C18neg	-	4	-0.114929	0.00368086	-0.115253	0.00966978	-
92.9445	22.2	-	C18neg	-	4	-0.024611	0.00172545	-0.0221004	0.00966978	-
798.565	235.1	-	C18neg	-	4	-0.117991	0.00268374	-0.11315	0.00966978	-
210.842	22.5	-	C18neg	-	4	-0.0286174	0.00339913	-0.0280202	0.00967244	-
89.0399	25.2	-	C18neg	-	4	0.0559449	0.00153994	0.0484796	0.00973959	-
590.677	23	-	C18neg	-	4	-0.0750952	0.00671367	-0.0794774	0.00973959	-
665.085	25.1	-	C18neg	-	4	0.0685214	0.00248954	0.0630419	0.00973959	-
801.586	248.9	-	C18neg	-	4	-0.115607	0.00158816	-0.100778	0.00973959	-
822.565	231.6	-	C18neg	-	4	-0.119495	0.00113936	-0.0992071	0.00973959	-
236.106	178.6	-	C18neg	-	4	-0.238615	0.00268374	-0.224755	0.00973959	-
336.787	23.2	-	C18neg	-	4	-0.0800661	0.0047299	-0.0817781	0.00982193	-
272.794	22.2	-	C18neg	-	4	-0.100705	0.00292803	-0.094532	0.0103346	-
322.932	26.2	-	C18neg	-	4	-0.0880706	0.00268374	-0.0810621	0.0103346	-
322.904	29.2	-	C18neg	-	4	-0.282632	0.00760707	-0.307744	0.0106458	-
371.024	27.6	-	C18neg	-	4	0.0645641	0.00368086	0.0618835	0.0106524	-
398.951	29.6	-	C18neg	-	4	-0.106209	0.00242868	-0.0938542	0.0107498	-
459.11	20	-	C18neg	-	4	0.0894744	0.0055201	0.0904732	0.0112275	-
92.9115	21.7	-	C18neg	-	4	-0.0241146	0.00214056	-0.0209027	0.0112689	-
671.101	31.7	-	C18neg	-	4	0.103544	0.00337443	0.0975029	0.0112689	-
388.922	26.3	-	C18neg	-	4	-0.0941783	0.00301232	-0.086039	0.0113701	-
638.518	22.1	-	C18neg	-	4	-0.082173	0.00671367	-0.08449	0.0113701	-
252.947	26.6	-	C18neg	-	4	-0.0759857	0.00268374	-0.0668409	0.011807	-
310.15	24	-	C18neg	-	4	0.0871465	0.00188007	0.0718811	0.0133612	-
420.749	23.2	-	C18neg	-	4	-0.022177	0.0048629	-0.0216258	0.0135499	-
410.978	27.9	-	C18neg	-	4	0.0661522	0.0113617	0.0733747	0.0135861	-
518.695	22.7	-	C18neg	-	4	-0.0874301	0.0067781	-0.0885247	0.0135861	-
586.593	22.5	-	C18neg	-	4	-0.0374847	0.00268374	-0.0327071	0.0135861	-
424.878	24.6	-	C18neg	-	4	0.126756	0.00461422	0.120661	0.0138929	-
596.291	163.5	-	C18neg	-	4	0.0922847	0.000542286	0.0647299	0.0138929	-
421.963	49.6	-	C18neg	-	4	-0.0698324	0.00815372	-0.0715482	0.0140383	-
424.954	31.4	-	C18neg	-	4	0.070873	0.0067781	0.069967	0.0142693	-
800.582	245.4	-	C18neg	-	4	-0.0879253	0.00242868	-0.0735158	0.0150495	-
455.213	259	-	C18neg	-	4	0.102097	0.0127282	0.113485	0.0151636	-
528.634	22.6	-	C18neg	-	4	-0.0396939	0.00370979	-0.0354237	0.0157536	-
342.913	23.6	-	C18neg	-	4	0.0528907	0.0074843	0.0530382	0.0160659	-
308.923	25.9	-	C18neg	-	4	-0.0592474	0.00538938	-0.0551955	0.0164814	-
94.9421	21.5	-	C18neg	-	4	-0.0216675	0.00456848	-0.0196397	0.0173726	-
474.759	24	-	C18neg	-	4	-0.0632863	0.0067781	-0.0598255	0.0179231	-
554.727	23.9	-	C18neg	-	4	-0.0398376	0.0047299	-0.0356114	0.0179309	-
224.999	25.7	-	C18neg	-	4	0.0373728	0.00292803	0.0314371	0.0179309	-
470.675	23.5	-	C18neg	-	4	-0.0339183	0.00368086	-0.029111	0.01835	-
493.003	30.7	-	C18neg	-	4	-0.221894	0.00809466	-0.217213	0.01835	-
132.949	59.2	-	C18neg	-	4	0.118288	0.0343104	0.153018	0.01835	-
156.878	22	-	C18neg	-	4	-0.0347831	0.00536658	-0.0318814	0.0184431	-
524.686	22.7	-	C18neg	-	4	-0.101108	0.0168739	-0.111956	0.0186063	-
597.293	161	-	C18neg	-	4	0.121282	0.00131026	0.0870617	0.0186063	-
291.143	22	-	C18neg	-	4	0.0953096	0.0200445	0.106978	0.0188972	-
483.946	137.2	-	C18neg	-	4	0.166386	0.0102416	0.166194	0.0188972	-
142.012	51.9	-	C18neg	-	4	-0.160539	0.00815372	-0.15266	0.0188972	-
94.908	22.1	-	C18neg	-	4	-0.0215902	0.00443029	-0.0186618	0.0188972	-
154.881	21.6	-	C18neg	-	4	-0.0237058	0.0083497	-0.0229673	0.0188972	-
157.012	24.1	-	C18neg	-	4	0.0405598	0.00268374	0.032523	0.0188972	-
254.944	26.5	-	C18neg	-	4	-0.0818259	0.0065903	-0.0745435	0.0198183	-
166.981	20.1	-	C18neg	-	4	0.0478138	0.0113651	0.0483601	0.0198183	-
348.908	45.5	-	C18neg	-	4	-0.0934056	0.0130698	-0.0957222	0.0199356	-
608.648	23.4	-	C18neg	-	4	-0.0439047	0.0067781	-0.0398925	0.0199356	-
614.684	24.2	-	C18neg	-	4	-0.0400737	0.0074843	-0.0370455	0.0199356	-
530.719	23.6	-	C18neg	-	4	-0.0551028	0.0148224	-0.0573428	0.0204845	-
292.986	25.6	-	C18neg	-	4	0.0359498	0.00339913	0.0290974	0.0214676	-
397.223	61.2	-	C18neg	-	4	0.219922	0.00310102	0.174844	0.0214829	-
560.99	29	-	C18neg	-	4	-0.268872	0.00722199	-0.242864	0.0218001	-
435.976	27.2	-	C18neg	-	4	0.0427389	0.0199976	0.0469732	0.022186	-
185.044	21.2	-	C18neg	-	4	0.0832978	0.00494183	0.0700632	0.022186	-
401.87	129.7	-	C18neg	-	4	0.197925	0.00871707	0.184771	0.0228782	-
89.0089	25	-	C18neg	-	4	0.0507726	0.00301232	0.0393907	0.0234168	-
334.95	30.5	-	C18neg	-	4	-0.31019	0.0111478	-0.297572	0.0236709	-
346.938	32.6	-	C18neg	-	4	-0.0745698	0.0067781	-0.0655063	0.0236709	-
490.279	184.6	-	C18neg	-	4	-0.0620976	0.0114897	-0.0601123	0.0237598	-
618.951	28.3	-	C18neg	-	4	-0.283292	0.00853125	-0.258171	0.0238689	-
92.928	22.9	-	C18neg	-	4	-0.0167305	0.0107229	-0.0159426	0.0239969	-
104.934	24.6	-	C18neg	-	4	-0.0359659	0.011331	-0.0344729	0.0241201	-
598.62	23	-	C18neg	-	4	-0.0382603	0.00846696	-0.0347795	0.0250449	-
102.976	25.3	-	C18neg	-	4	-0.0145829	0.00268374	-0.0107957	0.0258675	-
823.57	232.1	-	C18neg	-	4	-0.0934876	0.0067781	-0.081398	0.0260955	-
330.963	28.6	-	C18neg	-	4	-0.0736879	0.00722199	-0.0632798	0.0262751	-
470.973	36.9	-	C18neg	-	4	0.0832671	0.0166548	0.0845402	0.0262751	-
518.933	29	-	C18neg	-	4	0.0480028	0.0233506	0.0517801	0.0265476	-
380.257	184.9	-	C18neg	-	4	-0.121749	0.00653915	-0.102805	0.027237	-
578.562	22.3	-	C18neg	-	4	-0.0502022	0.0128028	-0.0483728	0.0273739	-
202.998	23.4	-	C18neg	-	4	0.0521527	0.010742	0.0478081	0.0273739	-
284.869	41.4	-	C18neg	-	4	-0.151944	0.00778836	-0.130855	0.0274057	-
621.208	275.4	-	C18neg	-	4	0.302549	0.0107229	0.280587	0.0275097	-
674.244	200.2	-	C18neg	-	4	-0.113421	0.00728729	-0.0967114	0.0279781	-
366.995	32	-	C18neg	-	4	0.125805	0.0214024	0.129704	0.0287042	-
564.331	225.9	-	C18neg	-	4	-0.0501206	0.0352442	-0.0573032	0.0287042	-
164.91	23	-	C18neg	-	4	-0.0247074	0.00817165	-0.0214221	0.0287368	-
96.9221	22.7	-	C18neg	-	4	-0.0176028	0.00667264	-0.0145575	0.028863	-
338.906	27.2	-	C18neg	-	4	-0.0968263	0.00891548	-0.0846733	0.0289557	-
478.707	22.8	-	C18neg	-	4	-0.0207157	0.00853125	-0.0180784	0.0292509	-
338.784	23	-	C18neg	-	4	-0.0519897	0.0201889	-0.052739	0.0301887	-
433.024	33.2	-	C18neg	-	4	0.0846521	0.013106	0.0806681	0.0301887	-
344.135	23.5	-	C18neg	-	4	0.171348	0.0134308	0.159742	0.0318253	-
647.321	174.7	-	C18neg	-	4	0.133117	0.00523368	0.103597	0.0322809	-
500.484	199.6	-	C18neg	-	4	-0.0864842	0.00984293	-0.0760363	0.0325542	-
774.569	240.1	-	C18neg	-	4	-0.0742134	0.0116371	-0.0682374	0.0325542	-
169.017	165.9	-	C18neg	-	4	-0.030588	0.0247355	-0.0320969	0.0338555	-
804.575	266.4	-	C18neg	-	4	-0.0790086	0.0214024	-0.0793924	0.0341059	-
291.003	140.5	-	C18neg	-	4	-0.192857	0.0107252	-0.166953	0.0347152	-
398.901	62.2	-	C18neg	-	4	-0.166287	0.0126013	-0.149449	0.0350429	-
507.272	167.2	-	C18neg	-	4	0.0515681	0.00877977	0.0431118	0.0350429	-
272.073	26.1	-	C18neg	-	4	0.0964134	0.019135	0.0904874	0.0387102	-
622.809	28.8	-	C18neg	-	4	0.156528	0.0443448	0.176782	0.0387102	-
196.04	38.1	-	C18neg	-	4	-0.256147	0.010261	-0.217066	0.0392781	-
282.958	24.6	-	C18neg	-	4	0.0361052	0.00666575	0.0277816	0.0400088	-
174.03	23.9	-	C18neg	-	4	0.0381253	0.0047299	0.0274505	0.0400541	-
102.938	25.3	-	C18neg	-	4	-0.0122569	0.00925128	-0.00988302	0.0436561	-
318.939	27.7	-	C18neg	-	4	-0.0806675	0.00760707	-0.0624754	0.0447444	-
425.017	30	-	C18neg	-	4	-0.150463	0.0157887	-0.133153	0.0447444	-
119.947	160.3	-	C18neg	-	4	0.256465	0.0148183	0.226314	0.0454007	-
622.302	178.4	-	C18neg	-	4	0.051914	0.0149891	0.0451871	0.045981	-
176.027	23.6	-	C18neg	-	4	0.0451887	0.0103864	0.0359059	0.0474352	-
114.99	32.3	-	C18neg	-	4	-0.020682	0.0108825	-0.0170388	0.0479335	-
584.356	190.3	-	C18neg	-	4	-0.104488	0.0166548	-0.0920802	0.0480221	-
284.955	24.3	-	C18neg	-	4	0.045933	0.0115226	0.0376425	0.0481459	-
117.929	294.7	-	C18neg	-	4	-0.0551848	0.0256224	-0.0524726	0.0488013	-
404.896	26.3	-	C18neg	-	4	-0.0614744	0.00853125	-0.0468839	0.0488013	-
907.577	201.6	-	C18neg	-	4	-0.17629	0.0114171	-0.144738	0.0488013	-
148.98	24.3	-	C18neg	-	4	0.0364312	0.00817165	0.0278306	0.0488013	-
481.259	161.4	-	C18neg	-	4	0.150363	0.0238987	0.142278	0.0490938	-
266.85	55.5	-	Hilicpos	-	4	-0.0312286	0.000736185	-0.0339225	0.00125235	-
304.903	59.1	-	Hilicpos	-	4	0.13263	0.000470438	0.141281	0.00125235	-
545.341	37.9	-	Hilicpos	-	4	-0.095744	0.000158114	-0.0851779	0.00125235	-
302.906	59.2	-	Hilicpos	-	4	0.126106	0.000996449	0.131535	0.00210408	-
1040.67	38.7	-	Hilicpos	-	4	-0.124897	0.000470438	-0.121764	0.00210408	-
150.933	54.9	-	Hilicpos	-	4	-0.0325535	0.000882095	-0.0330592	0.00211957	-
255.978	70.3	-	Hilicpos	-	4	-0.0554136	0.000158114	-0.0477468	0.00211957	-
323.965	71.6	-	Hilicpos	-	4	-0.0584969	0.000158114	-0.0515786	0.00211957	-
360.864	59.3	-	Hilicpos	-	4	0.188915	0.000470438	0.180572	0.00244509	-
640.939	48.6	-	Hilicpos	-	4	-0.112757	0.00247882	-0.123179	0.00371065	-
580.73	53.3	-	Hilicpos	-	4	0.233616	0.00508382	0.275026	0.0045767	-
132.13	44.5	-	Hilicpos	-	4	0.0571734	0.000158114	0.0453393	0.0045767	-
391.953	70.5	-	Hilicpos	-	4	-0.0574847	0.000235959	-0.0473575	0.00504639	-
196.865	57	-	Hilicpos	-	4	-0.028623	0.00255864	-0.0299298	0.00518492	-
461.025	46.4	-	Hilicpos	-	4	0.133679	0.00236479	0.138381	0.00518492	-
256.82	56.1	-	Hilicpos	-	4	-0.0302311	0.00259932	-0.0316528	0.00523012	-
198.862	55	-	Hilicpos	-	4	-0.0284211	0.00287891	-0.0293465	0.00677395	-
227.944	61.9	-	Hilicpos	-	4	-0.118012	0.00409118	-0.128793	0.00677395	-
254.823	56.2	-	Hilicpos	-	4	-0.0297228	0.0029992	-0.0307689	0.00682115	-
125	37.8	-	Hilicpos	-	4	-0.0311313	0.0058114	-0.0359613	0.00707138	-
558.295	40.8	-	Hilicpos	-	4	-0.067857	0.00341136	-0.0714578	0.00735938	-
248.781	60.8	-	Hilicpos	-	4	0.11521	0.00508382	0.126167	0.00752617	-
610.757	54.7	-	Hilicpos	-	4	-0.077433	0.00909802	-0.0931501	0.00763591	-
200.859	55.3	-	Hilicpos	-	4	-0.0260555	0.00480169	-0.0274774	0.00846659	-
333.824	61	-	Hilicpos	-	4	0.0793918	0.0119134	0.0976081	0.00846659	-
387.955	17.1	-	Hilicpos	-	4	0.292934	0.00409118	0.309579	0.00846659	-
1063.67	38.3	-	Hilicpos	-	4	-0.13379	0.00217602	-0.128071	0.00846659	-
131.697	44.7	-	Hilicpos	-	4	0.147988	0.00102351	0.129377	0.00846659	-
98.9842	34.2	-	Hilicpos	-	4	-0.0430124	0.00580081	-0.047524	0.00849021	-
270.797	53.7	-	Hilicpos	-	4	-0.0557058	0.00465478	-0.058158	0.00873951	-
320.878	60	-	Hilicpos	-	4	0.302436	0.00580081	0.330463	0.00873951	-
450.059	47.2	-	Hilicpos	-	4	0.0629731	0.000872037	0.0527397	0.00873951	-
459.94	69.9	-	Hilicpos	-	4	-0.0576797	0.000661246	-0.047727	0.00873951	-
428.696	54.1	-	Hilicpos	-	4	-0.0276973	0.00686337	-0.0305892	0.00896179	-
490.868	60.8	-	Hilicpos	-	4	-0.0222819	0.00494392	-0.023529	0.00896179	-
258.816	56.4	-	Hilicpos	-	4	-0.0270714	0.00481779	-0.0278525	0.00944603	-
488.871	66.6	-	Hilicpos	-	4	-0.0220887	0.00213404	-0.0200266	0.00944603	-
565.008	60.4	-	Hilicpos	-	4	-0.275069	0.00236479	-0.253508	0.00944603	-
657.396	37.8	-	Hilicpos	-	4	-0.1152	0.000846521	-0.0945737	0.00944603	-
765.837	67.6	-	Hilicpos	-	4	-0.0342514	0.0012226	-0.029271	0.00944603	-
1064.67	38.3	-	Hilicpos	-	4	-0.136007	0.00287891	-0.131198	0.00944603	-
828.809	67.2	-	Hilicpos	-	4	-0.0223485	0.00244476	-0.020664	0.00982383	-
133.1	31.5	-	Hilicpos	-	4	0.0438424	0.000892905	0.0361023	0.00982383	-
426.647	52.5	-	Hilicpos	-	4	0.0640731	0.0322443	0.0900139	0.0103219	-
86.1111	44.9	-	Hilicpos	-	4	0.0560454	0.000515451	0.0425492	0.0104488	-
519.832	54.4	-	Hilicpos	-	4	0.0984856	0.000892905	0.0791137	0.0106449	-
692.832	67.2	-	Hilicpos	-	4	-0.0230077	0.00147094	-0.0195943	0.0106449	-
370.738	55.3	-	Hilicpos	-	4	-0.0268633	0.00587097	-0.027789	0.0107119	-
533.808	54.2	-	Hilicpos	-	4	0.411717	0.00287891	0.378397	0.0107119	-
1037.78	67.9	-	Hilicpos	-	4	-0.0369039	0.00226192	-0.0323036	0.0107119	-
214.836	55.5	-	Hilicpos	-	4	-0.0198857	0.00580081	-0.0207642	0.0109326	-
341.961	55.4	-	Hilicpos	-	4	0.0764935	0.000470438	0.0566556	0.0109777	-
420.98	70.7	-	Hilicpos	-	4	-0.10802	0.00244476	-0.0964589	0.0109777	-
516.835	58.1	-	Hilicpos	-	4	-0.183058	0.00310596	-0.170382	0.0113649	-
556.859	66.9	-	Hilicpos	-	4	-0.022373	0.00217602	-0.0193705	0.0114775	-
518.605	54.9	-	Hilicpos	-	4	0.15761	0.0113707	0.178299	0.0120068	-
216.833	55	-	Hilicpos	-	4	-0.0245681	0.00409118	-0.0234075	0.0126572	-
1006.08	51.1	-	Hilicpos	-	4	0.0466281	0.00453898	0.0441651	0.0126572	-
1044.7	38.2	-	Hilicpos	-	4	-0.0779663	0.0111432	-0.0863736	0.0126572	-
465.005	70.5	-	Hilicpos	-	4	-0.173282	0.00846924	-0.184378	0.0128435	-
1016.67	38.4	-	Hilicpos	-	4	-0.0987231	0.00465478	-0.0951151	0.0128435	-
202.856	55.5	-	Hilicpos	-	4	-0.0251151	0.00656207	-0.0253211	0.0140365	-
833.587	30	-	Hilicpos	-	4	-0.077719	0.00407602	-0.0732273	0.0140365	-
212.838	55.5	-	Hilicpos	-	4	-0.0193639	0.0072387	-0.0201172	0.0140451	-
381.924	71.2	-	Hilicpos	-	4	-0.113247	0.00118823	-0.089506	0.0141257	-
228.974	58.2	-	Hilicpos	-	4	0.0936831	0.00850567	0.0973471	0.014687	-
266.947	58.9	-	Hilicpos	-	4	0.11994	0.0054232	0.116029	0.014687	-
271.952	74.5	-	Hilicpos	-	4	-0.143528	0.00247882	-0.122137	0.014687	-
638.945	52.4	-	Hilicpos	-	4	-0.124205	0.00542256	-0.119096	0.014687	-
138.906	57.6	-	Hilicpos	-	4	-0.0248778	0.00577171	-0.0240576	0.014687	-
624.846	66.9	-	Hilicpos	-	4	-0.0224846	0.00552409	-0.0216081	0.0147936	-
312.779	56.1	-	Hilicpos	-	4	-0.0264791	0.00741816	-0.0265373	0.0148344	-
495.009	45.6	-	Hilicpos	-	4	0.0934596	0.0113072	0.0989386	0.0154602	-
500.861	54.6	-	Hilicpos	-	4	-0.188788	0.00526086	-0.179597	0.0155161	-
1003.79	68.1	-	Hilicpos	-	4	-0.0417374	0.00249428	-0.0348179	0.0155357	-
173.03	69.6	-	Hilicpos	-	4	-0.29814	0.00099367	-0.221812	0.0160161	-
288.929	58.5	-	Hilicpos	-	4	0.06149	0.00656207	0.0605705	0.0160161	-
442.722	55.6	-	Hilicpos	-	4	-0.03179	0.0173247	-0.0358096	0.0160161	-
148.935	56.2	-	Hilicpos	-	4	-0.0235136	0.00636484	-0.0230066	0.0160161	-
366.963	48.6	-	Hilicpos	-	4	0.0905076	0.00602889	0.0879489	0.016093	-
896.797	67	-	Hilicpos	-	4	-0.0208459	0.00402724	-0.018619	0.0160938	-
1066.69	38.1	-	Hilicpos	-	4	-0.126262	0.0058897	-0.121946	0.0164621	-
318.773	54.5	-	Hilicpos	-	4	-0.0279354	0.0153516	-0.0305398	0.0164734	-
344.89	57.7	-	Hilicpos	-	4	0.0527865	0.011687	0.056079	0.0164734	-
567.324	39.5	-	Hilicpos	-	4	-0.144755	0.00572111	-0.137587	0.0164734	-
132.759	155.9	-	Hilicpos	-	4	0.174189	0.0140281	0.19103	0.0164734	-
424.85	59.6	-	Hilicpos	-	4	0.122546	0.00580081	0.114691	0.0165382	-
607.565	29.4	-	Hilicpos	-	4	0.072189	0.0253406	0.0889764	0.0172668	-
357.936	55.7	-	Hilicpos	-	4	0.111324	0.00587097	0.103339	0.0176214	-
372.735	55.3	-	Hilicpos	-	4	-0.0243199	0.0113072	-0.0249317	0.0176214	-
118.064	51.9	-	Hilicpos	-	4	0.0351932	0.0031085	0.0290631	0.0191037	-
266.928	49	-	Hilicpos	-	4	0.12159	0.0207183	0.137374	0.0192465	-
575.792	54.3	-	Hilicpos	-	4	0.0884078	0.00274697	0.0709845	0.0196482	-
1157.94	51	-	Hilicpos	-	4	0.11293	0.0352506	0.140428	0.0205857	-
350.896	57.6	-	Hilicpos	-	4	0.123015	0.0165124	0.13223	0.0207357	-
642.255	43.5	-	Hilicpos	-	4	-0.0641184	0.010198	-0.0637665	0.0207357	-
250.956	58.9	-	Hilicpos	-	4	0.0571788	0.0131863	0.0588526	0.0216773	-
579.534	25.5	-	Hilicpos	-	4	0.0708884	0.0184766	0.077664	0.021966	-
234.929	114.4	-	Hilicpos	-	4	-0.231901	0.0225359	-0.256338	0.022816	-
524.866	58.1	-	Hilicpos	-	4	-0.23109	0.00481865	-0.198419	0.022816	-
738.9	67.1	-	Hilicpos	-	4	-0.103046	0.0188558	-0.112717	0.022816	-
1236.73	67.4	-	Hilicpos	-	4	-0.0408694	0.00580081	-0.0361117	0.022816	-
394.702	54.1	-	Hilicpos	-	4	-0.0746728	0.00603334	-0.0675249	0.023013	-
399.919	54.5	-	Hilicpos	-	4	0.0679199	0.00195304	0.0496958	0.0230781	-
343.959	54.5	-	Hilicpos	-	4	0.120854	0.00331399	0.0965488	0.0234537	-
112.991	287.7	-	Hilicpos	-	4	-0.111853	0.0213892	-0.123553	0.0250151	-
260.814	54.1	-	Hilicpos	-	4	-0.0935228	0.0173247	-0.095507	0.0251059	-
585.884	70	-	Hilicpos	-	4	-0.320362	0.00656207	-0.286879	0.0251526	-
357.962	68.4	-	Hilicpos	-	4	-0.146765	0.0119134	-0.143676	0.0251776	-
362.019	67.6	-	Hilicpos	-	4	0.0895979	0.0054232	0.0758567	0.0253753	-
494.014	25.8	-	Hilicpos	-	4	0.0321191	0.0236142	0.0353905	0.0270243	-
807.569	31	-	Hilicpos	-	4	-0.0496187	0.0245739	-0.0552296	0.0270243	-
352.897	66.2	-	Hilicpos	-	4	-0.0817934	0.0113072	-0.077729	0.0274156	-
254.815	57.9	-	Hilicpos	-	4	0.0694565	0.0441198	0.0834423	0.0291657	-
663.902	70	-	Hilicpos	-	4	-0.131044	0.00549318	-0.10761	0.0305779	-
691.009	287.5	-	Hilicpos	-	4	0.16408	0.0186149	0.166038	0.0305779	-
620.968	61.7	-	Hilicpos	-	4	-0.296654	0.00793603	-0.259432	0.0305901	-
335.93	31	-	Hilicpos	-	4	0.0631953	0.00508382	0.050384	0.0334393	-
663.853	67.2	-	Hilicpos	-	4	-0.0287148	0.010198	-0.0254915	0.0343359	-
142.901	55.7	-	Hilicpos	-	4	-0.0193189	0.0191492	-0.018952	0.0348035	-
422.881	66.8	-	Hilicpos	-	4	-0.0191549	0.0173247	-0.0186804	0.0348837	-
792.87	68.8	-	Hilicpos	-	4	0.0953144	0.0207183	0.0976244	0.0349395	-
119.069	45.5	-	Hilicpos	-	4	0.03843	0.0054232	0.0304769	0.0355733	-
830.804	67.2	-	Hilicpos	-	4	-0.0214893	0.00806526	-0.0182536	0.0361627	-
684.489	51.1	-	Hilicpos	-	4	-0.0331265	0.00924516	-0.0285646	0.0361879	-
450.663	54.5	-	Hilicpos	-	4	-0.0223798	0.0153516	-0.0211159	0.0371366	-
762.815	67.5	-	Hilicpos	-	4	-0.0200115	0.0113707	-0.0176631	0.0386554	-
434.689	55.3	-	Hilicpos	-	4	-0.0438434	0.0107856	-0.0377203	0.0400427	-
152.947	209.2	-	Hilicpos	-	4	0.0580895	0.041379	0.0655328	0.0403159	-
221.988	67.8	-	Hilicpos	-	4	-0.0803868	0.0188367	-0.0761227	0.0403502	-
337.981	69.5	-	Hilicpos	-	4	0.0402863	0.00399278	0.0288503	0.0403502	-
1042.69	38.6	-	Hilicpos	-	4	-0.0716466	0.0227631	-0.0707657	0.0410216	-
522.011	284.2	-	Hilicpos	-	4	0.216058	0.0299319	0.223225	0.0414039	-
401.918	54.5	-	Hilicpos	-	4	0.0716055	0.00395376	0.0507245	0.0417375	-
243.053	45.9	-	Hilicpos	-	4	0.0493971	0.00640355	0.0381335	0.0434555	-
552.426	27.8	-	Hilicpos	-	4	-0.111431	0.0150646	-0.0994123	0.043739	-
639.94	69.9	-	Hilicpos	-	4	-0.0419163	0.0188558	-0.0391883	0.043739	-
248.976	59.9	-	Hilicpos	-	4	0.0566456	0.0188558	0.0530863	0.0439056	-
475.85	49.4	-	Hilicpos	-	4	0.165418	0.0143047	0.144498	0.0440159	-
300.004	70.3	-	Hilicpos	-	4	-0.0343744	0.0239914	-0.0339764	0.0440486	-
134.018	76.2	-	Hilicpos	-	4	0.0430902	0.00465478	0.0307606	0.0440486	-
269.994	69.7	-	Hilicpos	-	4	0.0417281	0.00465478	0.029774	0.0444568	-
527.928	70.3	-	Hilicpos	-	4	-0.0692298	0.00790765	-0.055373	0.0444568	-
516.65	57	-	Hilicpos	-	4	-0.0400739	0.00639136	-0.0305307	0.0456153	-
882.874	69	-	Hilicpos	-	4	0.477781	0.00407602	0.328671	0.0465545	-
677.916	69.8	-	Hilicpos	-	4	0.0375236	0.00465478	0.0263885	0.0469265	-
634.401	38.9	-	Hilicpos	-	4	-0.066761	0.0227631	-0.0624595	0.0479697	-
350.918	60.5	-	Hilicpos	-	4	0.0936483	0.0324927	0.0936499	0.0482703	-
249.94	61.4	-	Hilicpos	-	4	0.164229	0.0299368	0.162672	0.0484974	-
224.865	55.7	-	Hilicpos	-	4	-0.0308257	0.0234993	-0.0286737	0.049579	-
557.862	65.9	-	Hilicpos	-	4	-0.130263	0.0247575	-0.123738	0.049579	-
285.902	61.6	-	Hilicpos	-	4	-0.216618	0.0242048	-0.204865	0.0496863	-
1071.78	64.9	-	Hilicpos	-	4	-0.030406	0.00821822	-0.0231564	0.0504332	-
438.886	48.3	-	C18neg	-	4	-0.125806	0.0427948	-0.128543	0.0511265	-
187.991	70.7	-	Hilicpos	-	4	-0.11289	0.0210206	-0.102097	0.0520586	-
132.12	44.8	-	Hilicpos	-	4	0.142368	0.00810984	0.107687	0.0522531	-
281.993	75.9	-	Hilicpos	-	4	0.0901061	0.0175313	0.0782866	0.0523424	-
499.905	14.5	-	Hilicpos	-	4	-0.0474551	0.0191492	-0.0421361	0.0525335	-
622.401	68.6	-	Hilicpos	-	4	0.0467641	0.0080883	0.0360137	0.0525335	-
146.983	24.4	-	C18neg	-	4	0.0348773	0.0107919	0.0273514	0.0526848	-
512.333	41.7	-	Hilicpos	-	4	-0.0456007	0.03166	-0.0440155	0.0528796	-
598.309	170.3	-	C18neg	-	4	0.0771404	0.0074843	0.0561079	0.0529376	-
121.084	45.8	-	Hilicpos	-	4	0.0303069	0.0188624	0.0260144	0.0534125	-
352.914	55.2	-	Hilicpos	-	4	0.0645207	0.0404289	0.0650932	0.053767	-
568.265	196.9	-	C18neg	-	4	-0.0695577	0.0113617	-0.0545186	0.0543056	-
600.979	69.2	-	Hilicpos	-	4	-0.210884	0.0119134	-0.171331	0.0552563	-
154.026	61.3	-	Hilicpos	-	4	0.0868965	0.0145088	0.0701712	0.0570926	-
235.008	26.4	-	C18neg	-	4	0.0361178	0.0488718	0.0374537	0.0575797	-
178.024	57.3	-	Hilicpos	-	4	0.0631446	0.0107237	0.0479538	0.0579039	-
138.013	17.8	-	Hilicpos	-	4	0.0475352	0.0352506	0.0460473	0.0579039	-
232.016	61.3	-	Hilicpos	-	4	-0.0412278	0.0362888	-0.0410326	0.0596991	-
90.0707	70.4	-	Hilicpos	-	4	0.1157	0.00401634	0.0724662	0.0625921	-
262.901	24.9	-	C18neg	-	4	0.0361366	0.0139308	0.028621	0.0639234	-
340.916	23.6	-	C18neg	-	4	0.0317566	0.0228853	0.0277123	0.0640744	-
526.638	22.7	-	C18neg	-	4	-0.0434439	0.0120627	-0.0331766	0.0640744	-
158.021	82	-	C18neg	-	4	0.161409	0.0191884	0.134221	0.0654022	-
334.926	27.2	-	C18neg	-	4	0.234799	0.0448427	0.227845	0.0659665	-
906.575	200.7	-	C18neg	-	4	-0.0495699	0.0302871	-0.0444011	0.0665095	-
263.038	23.8	-	C18neg	-	4	0.0425808	0.0103448	0.0302967	0.0693833	-
297.662	40.2	-	Hilicpos	-	4	0.0894134	0.0324927	0.0798314	0.0726614	-
232.897	60.8	-	Hilicpos	-	4	-0.033703	0.0410898	-0.0311252	0.0744001	-
444.953	27.2	-	C18neg	-	4	0.0670655	0.0488344	0.0662117	0.0750714	-
497.676	21.2	-	C18neg	-	4	-0.18289	0.0354755	-0.163036	0.0758939	-
600.705	23.7	-	C18neg	-	4	-0.0802245	0.0486174	-0.076897	0.0768897	-
180.973	28.1	-	C18neg	-	4	-0.0169934	0.0302169	-0.0147588	0.0768897	-
187.014	23.4	-	C18neg	-	4	0.0342805	0.0299356	0.0290371	0.0768897	-
272.929	23.5	-	C18neg	-	4	0.0339548	0.0152387	0.0256496	0.0786163	-
799.569	235.7	-	C18neg	-	4	-0.0825651	0.0368521	-0.0745582	0.0788639	-
279.964	54.1	-	Hilicpos	-	4	0.114882	0.035555	0.103115	0.0797518	-
503.966	70.1	-	Hilicpos	-	4	-0.0224292	0.0477278	-0.0217676	0.0797518	-
242.02	68	-	Hilicpos	-	4	0.150071	0.0370488	0.132271	0.0821016	-
532.993	71.1	-	Hilicpos	-	4	-0.400357	0.0196404	-0.318072	0.0821016	-
452.061	71.8	-	Hilicpos	-	4	0.15672	0.0491976	0.149932	0.0826964	-
245.95	70.5	-	Hilicpos	-	4	-0.095092	0.0352506	-0.0851698	0.0834596	-
222.867	56	-	Hilicpos	-	4	-0.0272551	0.0462432	-0.025378	0.0841556	-
328.161	40.5	-	C18neg	-	4	0.0410518	0.0286543	0.0336657	0.0849771	-
624.533	51.4	-	Hilicpos	-	4	-0.0270411	0.0245739	-0.0217774	0.0853676	-
992.676	38.7	-	Hilicpos	-	4	0.108868	0.0453088	0.101135	0.0853676	-
277.967	52.1	-	Hilicpos	-	4	0.0505582	0.0247575	0.0405607	0.0864424	-
834.518	229.2	-	C18neg	-	4	0.113294	0.0214024	0.088374	0.086614	-
392.007	25.6	-	C18neg	-	4	0.0740619	0.0113617	0.0508303	0.0880616	-
270.997	71.2	-	Hilicpos	-	4	0.0382676	0.0113707	0.0257726	0.0906109	-
704.356	55.5	-	Hilicpos	-	4	0.060124	0.0478565	0.0553233	0.0906109	-
307.899	41.2	-	Hilicpos	-	4	0.193271	0.0227631	0.14946	0.0919788	-
91.0583	70.2	-	Hilicpos	-	4	0.0447252	0.0126248	0.0302671	0.0956911	-
142.072	61	-	Hilicpos	-	4	-0.075574	0.0349128	-0.0612816	0.0988106	-
267.196	138.7	-	C18neg	-	4	-0.0902719	0.0388774	-0.0776717	0.0993765	-
330.888	28.8	-	C18neg	-	4	0.0306482	0.0443448	0.0267078	0.100939	-
635.748	54.3	-	Hilicpos	-	4	0.0620056	0.0142821	0.0419132	0.101548	-
284.91	62.9	-	Hilicpos	-	4	-0.0191058	0.0469813	-0.0169933	0.103996	-
571.952	70	-	Hilicpos	-	4	-0.0265467	0.0330852	-0.021483	0.104254	-
98.0236	83.4	-	Hilicpos	-	4	-0.0778279	0.0434107	-0.0666255	0.105334	-
199.011	143.8	-	C18neg	-	4	0.198157	0.0461631	0.164183	0.119118	-
572.616	55.8	-	Hilicpos	-	4	-0.0401379	0.0364829	-0.0298718	0.139383	-
720.96	70	-	Hilicpos	-	4	0.274641	0.0236778	0.181958	0.145489	-
328.663	39.4	-	C18neg	-	4	0.0529281	0.0283161	0.036354	0.145674	-
575.269	167	-	C18neg	-	4	-0.0917715	0.0311415	-0.0630862	0.154619	-
322.858	20.5	-	C18neg	-	4	0.0267008	0.0442496	0.0200228	0.158189	-
248.054	26	-	C18neg	-	4	0.0531904	0.0264198	0.0341252	0.160791	-
97.8514	45.1	-	Hilicpos	-	4	0.119774	0.0478565	0.0898314	0.161899	-
633.751	54.4	-	Hilicpos	-	4	0.0962184	0.047448	0.0659922	0.185034	-
652.968	49.6	-	Hilicpos	-	4	0.298949	0.0192167	0.165478	0.18689	-
745.904	69.8	-	Hilicpos	-	4	0.0248695	0.0412769	0.0164409	0.189287	-
403.915	54.4	-	Hilicpos	-	4	0.0617804	0.0344475	0.0385256	0.195009	-
451.842	53.9	-	Hilicpos	-	4	0.109475	0.0263827	0.0611242	0.207361	-
361.832	61.5	-	Hilicpos	-	4	-0.088851	0.0483932	-0.0501922	0.261915	-
282.012	49	3-Mercaptopyruvic acid	Hilicpos	2M+ACN+H	4	0.0524268	0.00332973	0.0498403	0.0105739	Alpha-keto acids
296.134	24.1	Arginyl-Threonine	C18neg	M+Na-2H	4	0.125783	0.00247915	0.103731	0.0164814	Amino acids and peptides
241.07	25.7	Asparaginyl-Glutamate	C18neg	M-H2O-H	4	0.160229	0.00847461	0.132603	0.0369321	Amino acids and peptides
104.058	45.9	Asparaginyl-Glycine	Hilicpos	M+H+NH4	4	0.0309588	0.0165124	0.0273778	0.044745	Amino acids and peptides
414.215	29	Biocytin	Hilicpos	M+ACN+H	4	-0.199757	0.0183899	-0.187204	0.0431284	Amino acids and peptides
199.071	41.4	Glutamyl-alanine	C18neg	M-H2O-H	4	0.309259	0.0166416	0.262199	0.0557251	Amino acids and peptides
187.054	26.6	Glycyl-Methionine	C18neg	M-H2O-H	4	-0.378685	0.00214056	-0.416016	0.00401406	Amino acids and peptides
632.226	50.8	QYNAD	Hilicpos	M+Na	4	-0.447228	0.000627507	-0.396284	0.00602412	Amino acids and peptides
202.014	266.9	S-Carboxymethyl-cysteine	Hilicpos	M+Na	4	-0.0870368	0.0299368	-0.0863745	0.05058	Amino acids and peptides
156.028	29.3	threo-2-Amino-34-dihydroxybutanoic acid	C18neg	M+Na-2H	4	0.069258	0.00131026	0.0502438	0.018359	Amino acids and peptides
115.015	80.6	Ureidoglycolic acid	C18neg	M-H2O-H	4	0.11902	0.00105801	0.111944	0.00514856	Amino acids and peptides
154.069	36.9	Phenyl vinyl sulfide	Hilicpos	M+NH4	4	0.126814	0.000470438	0.133274	0.00125235	Aryl thioethers
449.01	70.1	Indoxyl sulfate	Hilicpos	2M+Na	4	0.223051	0.0059581	0.15453	0.058119	Arylsulfates
208.014	49.1	4-Chlorocatechol	Hilicpos	M+ACN+Na	4	0.0348396	0.0018435	0.0299	0.0106449	Benzenediols
381.023	68.7	4-Hydroxy-5-(dihydroxyphenyl)-valeric acid-O-methyl-O-sulphate	Hilicpos	M+2Na-H	4	0.139612	0.00374201	0.123155	0.0160161	Benzenediols
400.919	58.3	Silver sulfadiazine	Hilicpos	M+2Na-H	4	-0.104693	0.0297845	-0.10418	0.0494702	Benzenesulfonamides
120.056	44.6	Cinnamyl benzoate	Hilicpos	M+2H	4	0.150301	0.0186149	0.120884	0.0676225	Benzoic acids and derivatives
119.014	21.1	Gentisic acid	Hilicpos	M+H-2H2O	4	-0.0478997	0.01414	-0.0444883	0.0369858	Benzoic acids and derivatives
397.017	69.9	Bromfenac	Hilicpos	M+ACN+Na	4	-0.16752	0.00732821	-0.152167	0.0251776	Benzophenones
101.011	245.8	Erythrose 4-phosphate	Hilicpos	M+2H	4	-0.264486	0.0371406	-0.179917	0.171095	Carbohydrates and conjugates
402.036	26.4	Glucoerucin	C18neg	M-H2O-H	4	0.0834325	0.0286543	0.0791429	0.0511241	Carbohydrates and conjugates
367.989	27	Methyl glucosinolate	C18neg	M+Cl	4	0.0645478	0.00230547	0.0610093	0.00889103	Carbohydrates and conjugates
660.265	42	Paromomycin	Hilicpos	M+2Na-H	4	0.100966	0.0371937	0.0688616	0.164597	Carbohydrates and conjugates
142.065	45.9	Streptozocin	Hilicpos	M+H+NH4	4	0.0466736	0.00402724	0.0353041	0.0334393	Carbohydrates and conjugates
443.155	39.3	Verbasoside	C18neg	M-H2O-H	4	0.359004	0.00523368	0.318001	0.0188972	Carbohydrates and conjugates
268.8	22.3	11-Dibromo-1-chloro-2-propanone	C18neg	M+Na-2H	4	-0.05177	0.00456848	-0.0479455	0.0142693	Carbonyl compounds
87.0553	82.9	Formamide	Hilicpos	M+ACN+H	4	-0.0366	0.030473	-0.0223277	0.195009	Carboximidic acids
208.891	55.1	Chloral hydrate	Hilicpos	M+2Na-H	4	-0.0333231	0.000470438	-0.0345778	0.00125235	Chlorohydrins
90.0392	70.4	4-Methoxycinnamic acid	Hilicpos	M+2H	4	0.0920957	0.00580832	0.0644868	0.0554932	Cinnamic acids
650.124	31.7	Chymosin preparation escherichia coli k-12	C18neg	M-H2O-H	4	0.160219	0.00494183	0.157808	0.0112689	Depsipeptides
1065.68	38.1	Permetin A	Hilicpos	M+H-2H2O	4	-0.125619	0.00508382	-0.120795	0.014687	Depsipeptides
103.054	45.9	Thiodiglycol	Hilicpos	M+2ACN+2H	4	0.0303347	0.0191492	0.025537	0.0583594	Dialkylthioethers
352.024	33.7	Carboplatin	C18neg	M-H2O-H	4	0.0370038	0.0156502	0.040028	0.0188972	Dicarboxylic acids and derivatives
150.076	81.4	Monoethyl malonic acid	Hilicpos	M+NH4	4	-0.0740728	0.00127315	-0.0670287	0.00846659	Dicarboxylic acids and derivatives
405.967	78.2	Acifluorfen	Hilicpos	M+2Na-H	4	0.037906	0.00244476	0.0268036	0.0317361	Diphenylethers
517.836	54.7	Butter acids	Hilicpos	M+NH4	4	0.0835492	0.00602889	0.0670059	0.0363701	Diphenylmethanes
610.539	25.4	DG(32:0)	Hilicpos	M+ACN+H	4	0.155782	0.022488	0.102123	0.141243	Diradylglycerols
335.821	61	DG(38:0)	Hilicpos	M+H+NH4	4	0.0869038	0.0227631	0.095508	0.0250151	Diradylglycerols
473.959	57	Glycerol 12-dioctacosanoate	Hilicpos	M+ACN+2H	4	0.0379376	0.00287891	0.0257727	0.0414039	Diradylglycerols
921.641	36.1	(3beta5alpha9alpha14alpha22E24R)-35914-Tetrahydroxyergosta-722-dien-6-one	Hilicpos	2M+H	4	-0.0415493	0.0324413	-0.0297307	0.145429	Ergostane steroids
116.094	69.9	Guanadrel Sulfate	Hilicpos	M+H+NH4	4	0.0442189	0.042252	0.0249763	0.254064	Ethers
549.378	33.7	C20:4 Acylcarnitine	Hilicpos	M+2Na-H	4	-0.203574	0.011445	-0.165778	0.0504332	Fatty acid esters
313.036	70.2	4-Hydroxy-5-(3-hydroxyphenyl)-valeric acid-3-O-sulphate	Hilicpos	M+Na	4	0.106785	0.00426109	0.0777485	0.0403502	Fatty acids and conjugates
658.4	37.9	1-O-b-glucopyranosyl-13-octanediol	Hilicpos	2M+ACN+H	4	-0.185021	0.00249428	-0.168171	0.0107119	Fatty acyl glycosides
478.098	109.2	4-Coumaroyl-CoA	Hilicpos	M+ACN+2H	4	0.109755	0.04218	0.106647	0.0646784	Fatty acyl thioesters
134.064	82.6	S-Acetyldihydrolipoamide	Hilicpos	M+H+NH4	4	-0.0360062	0.0410113	-0.0220537	0.223467	Fatty amides
500.072	199.6	Delphinidin 3-glucoside	C18neg	M+Cl	4	-0.105965	0.00163873	-0.093695	0.00966978	Flavonoid glycosides
693.086	31.6	Eujambin	C18neg	M+Cl	4	0.0669509	0.00582256	0.062246	0.01835	Flavonoid glycosides
783.569	33.8	PA(18:018:2(9Z12Z))	Hilicpos	M+2ACN+H	4	-0.043401	0.0156239	-0.037583	0.0507433	Glycerophosphates
811.6	31.3	PC(35:3)	Hilicpos	M+ACN+H	4	-0.0511361	0.0058897	-0.0486596	0.0181908	Glycerophosphocholines
809.585	31.4	PC(35:4)	Hilicpos	M+ACN+H	4	-0.04927	0.00850567	-0.0414757	0.0410143	Glycerophosphocholines
848.648	29.6	PC(42:4)	Hilicpos	M+H-H2O	4	-0.122008	0.00481865	-0.104889	0.0239645	Glycerophosphocholines
964.783	66.6	PC(O-44:3)	Hilicpos	M+2ACN+H	4	-0.0231884	0.00580081	-0.0199184	0.0251526	Glycerophosphocholines
771.606	32.9	PC(P-33:1)	Hilicpos	M+ACN+H	4	-0.0547012	0.0165124	-0.0529037	0.0363453	Glycerophosphocholines
802.552	270.7	PC(P-36:3)	C18neg	M+Cl	4	0.0990827	0.00443029	0.0959771	0.011807	Glycerophosphocholines
1067.7	37.9	LysoPE(22:2)	Hilicpos	2M+H	4	-0.0768974	0.0245739	-0.0763765	0.043557	Glycerophosphoethanolamines
453.839	52.5	PE(32:4)	Hilicpos	M+2ACN+2H	4	0.112672	0.0444426	0.0771973	0.183503	Glycerophosphoethanolamines
726.408	50.7	PE(32:5)	Hilicpos	M+2Na-H	4	0.0938837	0.00639136	0.0955441	0.0137803	Glycerophosphoethanolamines
805.552	33.7	PE(40:8)	Hilicpos	M+NH4	4	-0.0536518	0.0107856	-0.047763	0.0361627	Glycerophosphoethanolamines
457.879	54.6	PE(48:1)	Hilicpos	M+2H	4	0.0882081	0.00341136	0.0632189	0.037414	Glycerophosphoethanolamines
767.575	31.4	PE(P-36:3)	Hilicpos	M+ACN+H	4	-0.051632	0.0206204	-0.048239	0.0463048	Glycerophosphoethanolamines
821.618	29.5	PE(P-38:1)	Hilicpos	M+ACN+Na	4	-0.0865717	0.00580252	-0.0824483	0.0164734	Glycerophosphoethanolamines
795.605	30.2	PE(P-38:3)	Hilicpos	M+ACN+H	4	-0.104016	0.0117659	-0.0974462	0.0325103	Glycerophosphoethanolamines
823.637	30.2	PE(P-40:3)	Hilicpos	M+ACN+H	4	-0.129202	0.0019071	-0.0996343	0.018457	Glycerophosphoethanolamines
717.527	43.3	CL(70:2)	Hilicpos	M+2H	4	0.147351	0.00395376	0.144891	0.0104488	Glycerophosphoglycerols
733.554	34.1	CL(72:0)	Hilicpos	M+2H	4	0.100021	0.0236142	0.0838599	0.071564	Glycerophosphoglycerols
773.587	33.7	Araliacerebroside	Hilicpos	M+ACN+H	4	-0.0964357	0.000158114	-0.0897976	0.00125235	Glycosphingolipids
780.443	55.6	Ganglioside GM1 (18:116:0)	Hilicpos	M+ACN+2H	4	-0.0570643	0.00420132	-0.0616823	0.00682115	Glycosphingolipids
782.97	33.8	Ganglioside GM1 (d18:018:0)	Hilicpos	M+H+NH4	4	-0.153685	0.0302111	-0.134958	0.0794547	Glycosphingolipids
609.933	52.8	Trihexosylceramide (d18:124:0)	Hilicpos	M+2ACN+2H	4	0.0729479	0.00287891	0.0492036	0.0425208	Glycosphingolipids
299.977	55.8	Lamotrigine	Hilicpos	M+2Na-H	4	0.122769	0.0386773	0.107895	0.085216	Halobenzenes
140.904	57.2	Chloroform	Hilicpos	M+Na	4	-0.0221259	0.00580832	-0.0233671	0.00982383	Halomethanes
177.962	71.7	Chloroxine	Hilicpos	M+H-2H2O	4	-0.143829	0.0205905	-0.116639	0.0744022	Haloquinolines
141.139	24.2	2-(1-Propenyl)-delta1-piperideine	Hilicpos	M+NH4	4	0.468136	0.0281389	0.455382	0.0509399	Hydropyridines
159.092	45.5	Indole	Hilicpos	M+ACN+H	4	0.0470098	0.00244476	0.036866	0.0197418	Indoles and derivatives
184.073	38.1	Tryptophanol	Hilicpos	M+Na	4	-0.028323	0.00481779	-0.0322843	0.00593807	Indoles and derivatives
312.935	59.3	Folpet	Hilicpos	M+NH4	4	0.0945647	0.00287891	0.106978	0.00327719	Isoindolines
603.35	218.2	33-Deoxy-33-hydroperoxyfurohyperforin	C18neg	M+Cl	4	-0.109123	0.000502913	-0.0999412	0.004095	Monoterpenoids
468.679	22.5	Chlordecone alcohol	C18neg	M-H2O-H	4	-0.0346388	0.00296294	-0.0319913	0.0112689	Monoterpenoids
388.991	28.5	6-Hydroxy-5-(4-sulfophenyl)azo-2-naphthalenesulfonic acid	C18neg	M-H2O-H	4	0.0788578	0.0037815	0.0794666	0.00966978	Naphthalene sulfonic acids
433.014	32.5	Allura red AC	C18neg	M-H2O-H	4	0.101473	0.0030456	0.0983384	0.00966978	Naphthalene sulfonic acids
192.032	109.6	Nifursol	Hilicpos	M+H+NH4	4	0.204202	0.0160753	0.168039	0.058119	Nitrophenols
135.022	69.8	Nitroglycerin	Hilicpos	M+ACN+2H	4	0.0562701	0.00481865	0.0417209	0.0410006	Organic nitrates
145.999	23.8	Ciliatine	C18neg	M+Na-2H	4	0.0835106	0.0236566	0.0611292	0.111708	Organic phosphonic acids
325.984	61.1	Mesna	Hilicpos	2M+ACN+H	4	-0.255206	0.00976486	-0.252034	0.0207357	Organosulfonic acids
581.365	293.7	endo-14-β-Xylanase	C18neg	M+Cl	4	-0.0980421	0.0149891	-0.105898	0.0188972	Phenylmethylamines
190.043	24.1	4-Phenylpyridine	C18neg	M+Cl	4	0.0488686	0.00142585	0.0407496	0.0103346	Phenylpyridines
244.056	46.1	4-Hydroxyphenylpyruvic acid	Hilicpos	M+ACN+Na	4	0.0600077	0.00566201	0.0489179	0.0325103	Phenylpyruvic acid derivatives
254.994	25.3	Imidazole acetophosphate	C18neg	M+Cl	4	-0.140097	0.0337793	-0.171996	0.0231852	Phosphate esters
750.573	55.5	CerP(d32:2)	Hilicpos	M+Na	4	-0.0486653	0.0255042	-0.0453594	0.0509399	Phosphosphingolipids
487.327	102.3	LysoSM(d18:0)	C18neg	M+Na-2H	4	0.148092	0.0169498	0.110338	0.0874908	Phosphosphingolipids
775.571	244.6	SM(d18:020:2(11Z14Z))	C18neg	M+Na-2H	4	-0.0932448	0.0247355	-0.0720701	0.0972816	Phosphosphingolipids
635.254	45.8	Dehydroisocoproporphyrinogen	Hilicpos	M+H-H2O	4	0.0856582	0.00243335	0.0637174	0.0250151	Porphyrins
595.29	160.9	Harderoporphyrinogen	C18neg	M-H2O-H	4	0.0945853	0.000502913	0.0655669	0.0138929	Porphyrins
306.012	24.4	Urothion	C18neg	M-H2O-H	4	0.14157	0.0200445	0.111079	0.083872	Pterins and derivatives
184.059	26.1	6-Dimethylaminopurine	C18neg	M+Na-2H	4	0.045482	0.000502913	0.0363161	0.00872551	Purines and purine derivatives
488.965	71.2	Xanthosine 5-triphosphate	Hilicpos	M+H-2H2O	4	-0.159446	0.00527854	-0.132523	0.0291657	Purines and purine derivatives
265.035	45.9	Bikojic acid	Hilicpos	M+H-H2O	4	0.0868184	0.00587097	0.0705535	0.0353036	Pyranones and derivatives
210.013	59.8	4-Pyridoxolactone	Hilicpos	M+2Na-H	4	0.0358763	0.00268723	0.0315002	0.012924	Pyridinecarboxylic acids
649.116	28.7	Cytidine monophosphate N-acetylneuraminic acid	C18neg	M+Cl	4	0.0886577	0.00142585	0.0863094	0.00514856	Pyrimidines and derivatives
269.028	61	UDP-Xylose	Hilicpos	M+2H	4	-0.213308	0.0152104	-0.192085	0.0431893	Pyrimidines and derivatives
339.289	26.3	9-Decenoylcholine	Hilicpos	M+2ACN+H	4	0.0343934	0.0453235	0.0335713	0.0731937	Quaternary ammonium salts
192.042	62.5	()-12a-Hydroxypachyrrhizone	Hilicpos	M+2H	4	0.0392969	0.0217846	0.0385748	0.0389191	Rotenoids
743.575	32.3	CE(22:5)	Hilicpos	M+2Na-H	4	-0.0463199	0.0192167	-0.0401075	0.0552563	Steroid esters
874.434	54.4	Spironolactone	Hilicpos	2M+ACN+H	4	-0.0444079	0.0442265	-0.0398598	0.0951798	Steroid lactones
613.336	215.1	Agavoside A	C18neg	M+Na-2H	4	-0.0765364	0.0037815	-0.0872729	0.00479349	Steroidal glycosides
554.797	57.6	Melongoside P	Hilicpos	M+ACN+2H	4	-0.0916557	0.00810984	-0.105758	0.00862491	Steroidal glycosides
697.846	68.1	Sativoside R1	Hilicpos	M+H+NH4	4	-0.0387268	0.000158114	-0.0345919	0.00125235	Steroidal glycosides
550.785	64.5	Araloside B	Hilicpos	M+ACN+2H	4	0.349075	0.01034	0.267817	0.0570789	Terpene glycosides
603.533	25.6	TG(36:0)	Hilicpos	M+H-2H2O	4	0.0756645	0.0247575	0.078382	0.0366603	Triradylcglycerols
428.874	50.2	TG(49:3)	Hilicpos	M+ACN+2H	4	0.0396969	0.04218	0.0296063	0.14421	Triradylcglycerols
936.802	67.8	TG(53:2)	Hilicpos	M+ACN+Na	4	-0.035641	0.00656207	-0.0330833	0.0197418	Triradylcglycerols
458.876	56	TG(56:10)	Hilicpos	M+H+NH4	4	-0.23305	0.0123422	-0.193861	0.0504332	Triradylcglycerols
901.808	67.6	TG(58:5)	Hilicpos	M+H-2H2O	4	-0.030649	0.0159463	-0.022531	0.0826964	Triradylcglycerols
1043.7	37.9	TG(64:11)	Hilicpos	M+2Na-H	4	-0.076988	0.00850567	-0.0851513	0.0107119	Triradylcglycerols
627.35	214.6	Avenestergenin B2	C18neg	M+Cl	4	-0.117887	0.0067781	-0.134099	0.00872551	Triterpenoids
656.395	69.3	Avenestergenin B2	Hilicpos	M+ACN+Na	4	0.040766	0.0371406	0.0292084	0.154754	Triterpenoids
560.818	57.5	Ginsenoside Rc	Hilicpos	M+ACN+2H	4	-0.423352	0.00564627	-0.368478	0.0245074	Triterpenoids
561.314	41	Rizatriptan	Hilicpos	2M+Na	4	-0.0565516	0.00806526	-0.0517558	0.0257972	Tryptamines and derivatives
275.108	24.8	(E)-1-4-Hydroxy-3-(3-methy13-butadienyl)pheny2-(35-dihydroxyphenyl)ethylene	C18neg	M-H2O-H	4	0.260587	0.00826704	0.231024	0.0270212	Undefined
628.134	26	2-Decarboxyphyllocactin	C18neg	M+Cl	4	0.14816	0.000502913	0.156247	0.00123325	Undefined
281.009	48.1	2-Propenyl 1-(2-propenylsulfinyl)propyl disulfide	Hilicpos	M+2Na-H	4	0.0374978	0.000872037	0.0314509	0.00873951	Undefined
248.96	31.1	5-(4-Chloro-3-hydroxy-1-butynyl)-22-bithiophene	C18neg	M-H2O-H	4	-0.0249608	0.0103864	-0.0209675	0.0399038	Undefined
262.976	30.9	5-Ethyny5-(1-propynyl)-22-bithiophene	C18neg	M+Cl	4	-0.0684807	0.00606274	-0.0618524	0.0188972	Undefined
120.081	46.5	Benzene	Hilicpos	M+ACN+H	4	0.0309557	0.0160753	0.0261549	0.0509399	Undefined
406.971	76.9	Bismuth Subsalicylate	Hilicpos	M+2Na-H	4	0.108713	0.00938547	0.078406	0.0664617	Undefined
318.882	60.9	Di-2-propenyl hexasulfide	Hilicpos	M+2Na-H	4	0.140469	0.00520262	0.149108	0.00920272	Undefined
244.949	59.8	Dimethylarsinous acid	Hilicpos	2M+H	4	0.140011	0.0016184	0.143872	0.00367371	Undefined
202.006	70	Enflurane	Hilicpos	M+NH4	4	0.0452152	0.00288442	0.0339981	0.0275789	Undefined
438.195	27.2	Eremopetasitenin A2	Hilicpos	M+ACN+H	4	0.0758492	0.0159847	0.0822973	0.0195327	Undefined
392.704	54	Hordatine B glucoside	Hilicpos	M+ACN+2H	4	-0.0242054	0.0119134	-0.0220616	0.0361627	Undefined
626.348	215	Janthitrem F	C18neg	M-H2O-H	4	-0.0934138	0.00370616	-0.102899	0.00596369	Undefined
119.072	44.5	N-Phenyl-2-naphthylamine	Hilicpos	M+H+NH4	4	0.0255604	0.0389293	0.0194678	0.129148	Undefined
402.772	116.4	Oxychlordane	Hilicpos	M+H-H2O	4	-0.116423	0.0371017	-0.109762	0.0651256	Undefined
298.025	66.3	Riluzole	Hilicpos	M+ACN+Na	4	0.0494115	0.0280206	0.0425642	0.0726614	Undefined
